# Supplementary material
Source: PubMed Central journal article supplement (PMC7649553)
Supplement: Supplemental_material1.pdf [file Supplemental_material1.pdf]

**Supplementary Table 1.** Antibodies used in direct immunofluorescence assays to detect bovine viruses in fetal bovine serum.

| Virus                              | Antibody                                                                                                                               | Provider             |
|------------------------------------|----------------------------------------------------------------------------------------------------------------------------------------|----------------------|
| Bluetongue virus                   | Bluetongue virus (BTV) direct fluorescent antibody conjugate                                                                           | VMRD                 |
| Bovine adenovirus                  | Bovine adenovirus 5 (BAV-5) direct fluorescent antibody conjugate<br>Bovine adenovirus 3 (BAV-3) direct fluorescent antibody conjugate | American BioResearch |
| Bovine herpesvirus 1               | Bovine herpesvirus 1 (BoHV-1) direct fluorescent antibody conjugate                                                                    | VMRD                 |
| Bovine parainfluenza virus 3       | Bovine parainfluenza 3 (BPIV-3) direct fluorescent antibody conjugate                                                                  | VMRD                 |
| Bovine parvovirus                  | Bovine parvovirus (BPV) direct fluorescent antibody conjugate                                                                          | VMRD                 |
| Bovine respiratory syncytial virus | Bovine respiratory syncytial virus (BRSV) direct fluorescent antibody conjugate                                                        | American BioResearch |
| BVDV-1, -2, and HoBi-like virus    | Bovine viral diarrhea virus (BVDV) direct fluorescent antibody conjugate                                                               | VMRD                 |
| Rabies                             | Conjugado antirrábico 15/06/047                                                                                                        | SENASA               |
| Reovirus                           | Reovirus 1, 2, and 3 (REO1-3) direct fluorescent antibody conjugate                                                                    | American BioResearch |
